# Supplementary material
Source: ML conference proceedings conference paper supplement (https://openaccess.thecvf.com/content/ICCV_2017/html/Chen_Show_Adapt_and_ICCV_2017_paper.html)
Supplement: Supplementary file 1 [file Chen_Show_Adapt_and_ICCV_2017_supplemental.pdf]

Archive with 7 entries (6 files):
- 0248-supp.pdf
- __MACOSX/
- __MACOSX/._0248-supp.pdf
- Critic-based Planning.mp4
- __MACOSX/._Critic-based Planning.mp4
- Show Adapt and Tell.mp4
- __MACOSX/._Show Adapt and Tell.mp4
