# Supplementary material
Source: ML conference proceedings conference paper supplement (https://openaccess.thecvf.com/content/ICCV_2017/html/Chen_Show_Adapt_and_ICCV_2017_paper.html)
Supplement: Supplementary file 1 [file Chen_Show_Adapt_and_ICCV_2017_supplemental.pdf › 0248-supp.pdf]

# Show, Adapt and Tell: Adversarial Training of Cross-domain Image Captioner

## Supplementary Material

Tseng-Hung Chen<sup>†</sup>, Yuan-Hong Liao<sup>†</sup>, Ching-Yao Chuang<sup>†</sup>, Wan-Ting Hsu<sup>†</sup>, Jianlong Fu<sup>‡</sup>, Min Sun<sup>†</sup>

<sup>†</sup>Department of Electrical Engineering, National Tsing Hua University, Hsinchu, Taiwan

<sup>‡</sup>Microsoft Research, Beijing, China

{tsenghung@gapp, andrewliaoll@gapp, cychuang@gapp, hsuwanting@gapp, sunmin@ee}.nthu.edu.tw  
jianf@microsoft.com

## 1. Dataset

### 1.1. Statistics

In Section 4.1 of the main paper, we mention that we use the same vocabulary in all experiments. Therefore, after removing the training sentences that contain out-of-vocabulary words, the numbers of captions for four target domain datasets (i.e., CUB-200, Oxford-102, TGIF<sup>1</sup>, Flickr30k) are shown in Table 1.

Table 1: Dataset statistics.

| Dataset    | Training captions | Training images |
|------------|-------------------|-----------------|
| CUB-200    | 25,926            | 4,000           |
| Oxford-102 | 22,716            | 5,823           |
| TGIF       | 65,526            | 79,984          |
| Flickr30k  | 117,664           | 29,000          |

### 1.2. Sentence-level Distribution

In order to compare the difference across datasets in sentence-level, we encode sentences using Skip-Thought Vectors [4] and use Barnes-Hut-SNE [5] to visualize the embeddings given a fixed number of sentences. For MSCOCO, Oxford-102 and CUB-200, sentence representations are similar in a single dataset but different across datasets (see Fig. 1). On the other hand, sentence representations in MSCOCO, Flickr30k and TGIF are more similar and have subtle difference (see Fig. 2).

## 2. Baseline: Sentence Augmentation (SA)

We re-implement the sentence augmentation method described in [7]. In order to train the captioner with target do-

<sup>1</sup>In TGIF, the visual contents are animated GIFs. To make it compatible with our captioner, we sample the first frame of each animated GIF as input image.

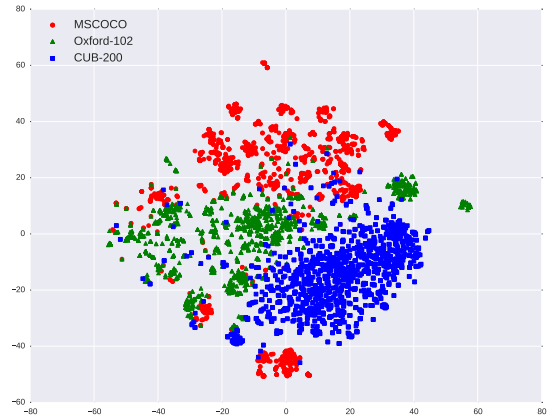

Figure 1: Barnes-Hut-SNE embeddings of skip-thought vectors on MSCOCO (red), Oxford-102 (green) and CUB-200 (blue).

main unpaired captions, we follow [7] to replace the image feature with the same all-zero vector. Then we train our captioner on both the source domain image-caption pairs and target domain sentence-only examples. The performance is shown in Table 2. Our method outperforms SA consistently for all four target domain datasets. Note that SA performs better than DCC [2]. We find that DCC emphasizes on image-caption semantic relation, whereas SA forces the sentence style resemble to target domain and does not consider if the semantic meaning is grounded in the image. On the contrary, our method considers both factors important.

We also provide the in-domain performances when training directly on paired image-caption data from the target domains in comparison with fine-tuning the source (MSCOCO) pre-trained model. We found the in-domain performances lower than fine-tuning (see Table 2) mainly because MSCOCO is a much larger dataset with diverse im-

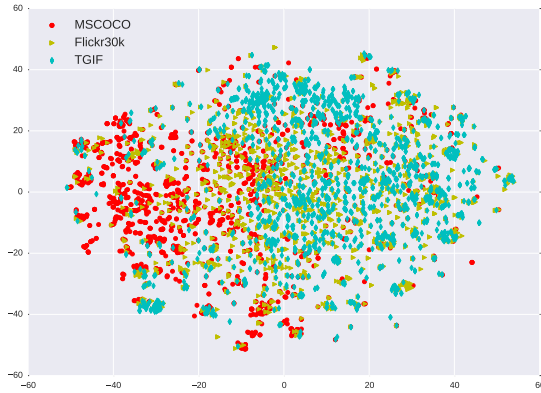

Figure 2: Barnes-Hut-SNE embeddings of skip-thought vectors on MSCOCO (red), Flickr30k (yellow) and TGIF (cyan).

Table 2: Results of our method compared with SA and DCC. DCC and SA are baseline methods. Target denotes the model directly trained on all paired image-caption data from the target domains. Fine-tuning with paired data in target domain serves as the upper bound performance of our CNN-RNN captioner.

|             | Target (test) | Bleu-4      | Meteor      | ROUGE       | CIDEr       |
|-------------|---------------|-------------|-------------|-------------|-------------|
| DCC         | CUB-200       | 21.4        | 23.8        | 46.4        | 11.9        |
| SA          | CUB-200       | 30.7        | 22.6        | 51.1        | 21.7        |
| Ours        | CUB-200       | <b>32.8</b> | <b>27.6</b> | <b>58.6</b> | <b>24.8</b> |
| Target      | CUB-200       | 42.1        | 30.3        | 59.6        | 18.8        |
| Fine-tuning | CUB-200       | 59          | 36.1        | 69.7        | 61.1        |
| DCC         | Oxford-102    | 16.7        | 21.5        | 38.3        | 6           |
| SA          | Oxford-102    | 20.3        | 19.4        | 40.7        | 15.2        |
| Ours        | Oxford-102    | <b>60.5</b> | <b>36.4</b> | <b>72.1</b> | <b>29.3</b> |
| Target      | Oxford-102    | 61.6        | 37          | 74.4        | 29.3        |
| Fine-tuning | Oxford-102    | 66.3        | 40          | 75.6        | 36.3        |
| DCC         | TGIF          | 4.1         | 11.8        | 29.5        | 7.1         |
| SA          | TGIF          | 8.2         | 13.6        | 34.9        | 18          |
| Ours        | TGIF          | <b>10.3</b> | <b>14.5</b> | <b>37</b>   | <b>22.2</b> |
| Target      | TGIF          | 8.1         | 14.2        | 34.2        | 23.2        |
| Fine-tuning | TGIF          | 11.8        | 16.2        | 39.2        | 29.8        |
| DCC         | Flickr30k     | 13.8        | 16.1        | 38.8        | 27.7        |
| SA          | Flickr30k     | 14.7        | 15.7        | 39.6        | 27.2        |
| Ours        | Flickr30k     | <b>17.9</b> | <b>16.7</b> | <b>42.1</b> | <b>32.6</b> |
| Target      | Flickr30k     | 16.9        | 17.7        | 41.7        | 33.2        |
| Fine-tuning | Flickr30k     | 18.3        | 18          | 42.9        | 35.9        |

ages and sentences.

### 3. Design Choices for Critics

For domain critic, we choose CNN as sentence encoding since [3] has shown its success on the task of text classi-

cation and SeqGAN [6] adopt CNN as their discriminative model. For multi-modal critic, we are inspired by the structure from VQA [1]. We also have explored a combination of design choices for sentence encoding. Performance comparison is shown in Table 3. We find that the design choice reported in the paper achieves the best performance in TGIF and Flickr30k and is comparable with "Both LSTM" (using LSTM as sentence encoding in both DC and MC) in CUB-200 and Oxford-102.

### 4. Additional Qualitative Results

We show more qualitative results in Fig. 3. For each example, we show two captions: before adaptation (source pre-trained) and after adaptation (using our method).

For critic-based planning, we show qualitative results on TGIF and Flickr30k in Fig. 4. For each example, we list three captions from top to bottom in the order of greedy search, beam search (with beam size 2) and our proposed critic-based planning.

### References

- [1] S. Antol, A. Agrawal, J. Lu, M. Mitchell, D. Batra, C. Lawrence Zitnick, and D. Parikh. Vqa: Visual question answering. In *ICCV*, 2015. 2
- [2] L. A. Hendricks, S. Venugopalan, M. Rohrbach, R. Mooney, S. Kate, and T. Darrell. Deep compositional captioning: Describing novel object categories without paired training data. In *CVPR*, 2016. 1
- [3] Y. Kim, Y. Jernite, D. Sontag, and A. M. Rush. Character-aware neural language models. *AAAI*, 2016. 2
- [4] R. Kiros, Y. Zhu, R. R. Salakhutdinov, R. Zemel, R. Urtasun, A. Torralba, and S. Fidler. Skip-thought vectors. In *Advances in neural information processing systems*, pages 3294–3302, 2015. 1
- [5] L. Van Der Maaten. Barnes-hut-sne. *arXiv preprint arXiv:1301.3342*, 2013. 1
- [6] L. Yu, W. Zhang, J. Wang, and Y. Yu. Seqgan: sequence generative adversarial nets with policy gradient. *AAAI*, 2017. 2
- [7] K.-H. Zeng, T.-H. Chen, J. C. Niebles, and M. Sun. Title generation for user generated videos. In *ECCV*, 2016. 1

Table 3: Results of different design choices for sentence encoding in Domain Critic (DC) and Multi-modal Critic (MC). Note that “Both CNN” stands for using CNN as sentence encoding in both DC and MC.

| Sentence Encoding   | Bleu-1      | Bleu-2      | Bleu-3      | Bleu-4      | Meteor      | ROUGE       | CIDEr       | SPICE       |
|---------------------|-------------|-------------|-------------|-------------|-------------|-------------|-------------|-------------|
| MSCOCO → CUB-200    |             |             |             |             |             |             |             |             |
| Both CNN            | 79.1        | 64.9        | 47.7        | 33.4        | 24.1        | 52.3        | 22.1        | 11          |
| Both LSTM           | 87.6        | <b>73.7</b> | <b>56.9</b> | <b>41.6</b> | 26          | 57.1        | <b>27.6</b> | <b>14.1</b> |
| DC: LSTM, MC: CNN   | 78.1        | 64.9        | 48.3        | 34.6        | 24          | 52.9        | 23.3        | 11.9        |
| DC: CNN, MC: LSTM   | <b>91.4</b> | 73.1        | 51.9        | 32.8        | <b>27.6</b> | <b>58.6</b> | 24.8        | 13.2        |
| MSCOCO → Oxford-102 |             |             |             |             |             |             |             |             |
| Both CNN            | 56.7        | 34          | 17.4        | 7.9         | 14.4        | 32.9        | 7.3         | 6.3         |
| Both LSTM           | <b>86.3</b> | <b>77.4</b> | <b>67.6</b> | <b>60.6</b> | <b>36.5</b> | 71.9        | <b>32.1</b> | <b>18</b>   |
| DC: LSTM, MC: CNN   | 58.5        | 35.3        | 18.7        | 8.5         | 14.7        | 33.7        | 7.2         | 6.6         |
| DC: CNN, MC: LSTM   | 85.6        | 76.9        | 67.4        | 60.5        | 36.4        | <b>72.1</b> | 29.3        | 17.9        |
| MSCOCO → TGIF       |             |             |             |             |             |             |             |             |
| Both CNN            | 47.7        | 28.7        | 17.4        | 9.8         | 14.2        | 36.6        | 20.3        | 10.2        |
| Both LSTM           | 47.5        | 28.1        | 16.8        | 9.6         | 14.2        | 36.3        | 21          | 10.1        |
| DC: LSTM, MC: CNN   | 47.5        | 28          | 16.6        | 9.2         | 14.2        | 36.4        | 19.2        | 10          |
| DC: CNN, MC: LSTM   | 47.5        | <b>29.2</b> | <b>17.9</b> | <b>10.3</b> | <b>14.5</b> | <b>37</b>   | <b>22.2</b> | <b>10.6</b> |
| MSCOCO → Flickr30k  |             |             |             |             |             |             |             |             |
| Both CNN            | 62          | 41.6        | 26.8        | 16.8        | 16.5        | 41.5        | 32.3        | 10          |
| Both LSTM           | 61.6        | 41.1        | 26.8        | 17.1        | 16.4        | 41.8        | 32.3        | <b>10.1</b> |
| DC: LSTM, MC: CNN   | 61.3        | 41          | 26.7        | 17.1        | 16.2        | 41.3        | 31.8        | 9.9         |
| DC: CNN, MC: LSTM   | <b>62.1</b> | <b>41.7</b> | <b>27.6</b> | <b>17.9</b> | <b>16.7</b> | <b>42.1</b> | <b>32.6</b> | 9.9         |

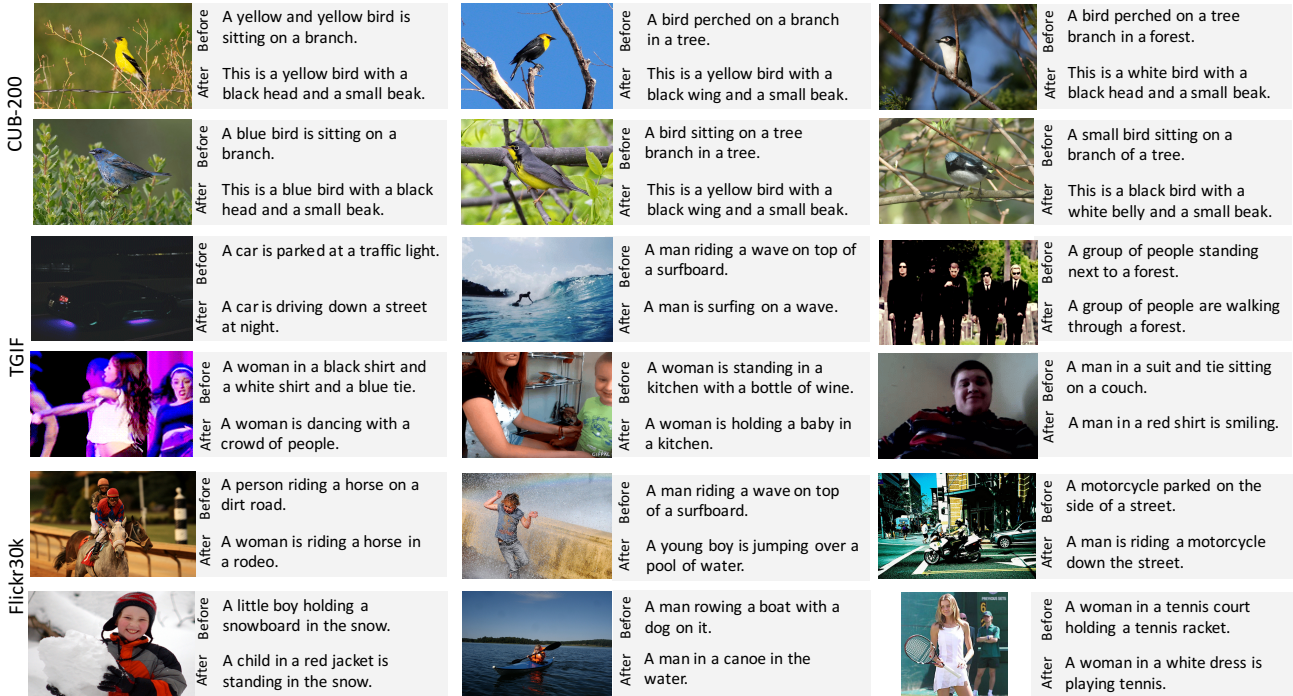

Figure 3: Additional examples of captions before and after domain adaptation.

## TGIF

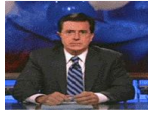

G: A man is speaking to a microphone and speaking .  
 B: A man in a suit is speaking to a microphone .  
 P: A man is looking at a microphone and smiling .

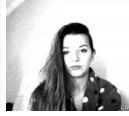

G: A man is smiling and holding a microphone .  
 B: A woman is looking at something .  
 P: A man in a black shirt is smiling .

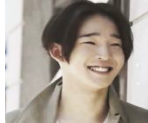

G: A man wearing a black shirt is talking .  
 B: A man in a blue shirt is singing .  
 P: A man wearing a white shirt is singing .

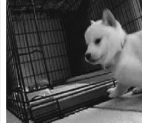

G: A cat is playing with a toy in the yard .  
 B: A cat is playing with a toy toy .  
 P: A white cat is looking at something in the cage .

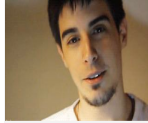

G: A man is holding a remote in his hand .  
 B: A man with a white shirt is dancing .  
 P: A man with a white shirt is dancing .

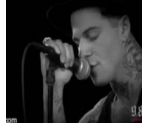

G: A man is singing into a microphone .  
 B: A man is singing into a microphone .  
 P: A man is singing into a microphone .

## Flickr30K

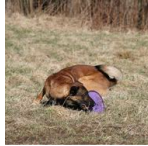

G: A dog is playing with a ball in the grass .  
 B: A brown dog playing with a ball in the grass .  
 P: A brown dog is playing with a ball in the grass .

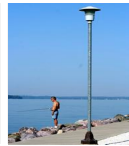

G: A man is standing on a dock in the water .  
 B: A man is standing on a dock in the water .  
 P: A man in a white shirt is standing on a dock near a body of water .

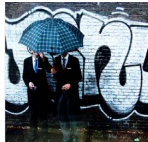

G: A man is holding a black umbrella in the water .  
 B: A group of people are holding umbrellas .  
 P: A man is holding an umbrella while standing in a pool .

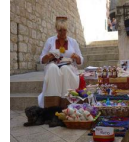

G: A man in a hat is sitting on a bench .  
 B: A man is sitting on a bench outside .  
 P: A man is sitting on a bench with a basket of food .

Figure 4: Additional examples of critic-based planning. G stands for greedy search, B for beam search, and P for critic-based planning. The underlined words denote that the difference between the maximum probability and the second largest probability of  $\pi$  is lower than  $\Gamma$  (selected by critic). When critic-based planning does not choose the word with maximum probability of  $\pi$ , the word is colored in red.
